# Supplementary material for: ASPSCR1-TFE3 orchestrates the angiogenic program of alveolar soft part sarcoma
Source: Research Square preprint supplement (doi:10.21203/rs.3.rs-1144566/v1), 2021-12-27
Supplement: Supplementary file 1 [file 6819edc8f5a1ca247a725e8e.xlsx]

## Sheet: Sheet1
Supplementary Table 4. Genes downregulated in ASPS-KY cells by ASPSCR1-TFE3 knockdown.
Gene Symbol	FC ([KY-siTFE3] vs [KY-siNC])
AATBC	-2.32951
ABCA13	-3.08142
ABCA5	-1.63887
ABCB1	-1.68262
ABCB1///ABCB4	-1.71726
ABCB5	-1.52272
ABCG1	-1.82995
ABCG2	-1.79175
ABHD2	-2.72331
ABHD6	-2.32714
ACOT11	-1.76009
ACSS2	-1.58774
ADGRF4	-1.57624
ADGRG1	-1.973
ADM	-1.74365
ADSSL1	-1.66839
AFF3	-2.25174
AGPAT3	-1.51507
AHNAK2	-1.74837
AKAP1	-1.52752
ALDOC	-1.53808
ANGPTL2	-1.64251
ANKRD30B	-2.89428
ANKRD36B	-1.89681
ANKRD6	-1.62945
ARHGAP8///PRR5-ARHGAP8	-2.52314
ARSK	-1.65215
ATP6V0D2	-2.36187
AVPI1	-2.20446
B3GNT2	-1.7051
BAIAP2	-1.75279
BAMBI	-2.14918
BDNF	-1.80369
BHLHE40	-2.25958
BNIP3	-1.55208
C10orf10	-1.69221
C12orf49	-2.0285
C1orf132	-1.66929
C5orf46	-2.04857
C7orf57	-1.73389
C7orf69	-1.84154
CA9	-2.04202
CACNA1E	-4.34295
CALML4	-1.83264
CARS2	-1.51805
CAST	-1.55701
CCDC58	-1.61159
CCND1	-1.5797
CCRL2	-2.10965
CD1D	-1.67221
CD276	-1.78627
CD36	-1.69095
CD55	-1.75573
CDCP1	-1.57184
CDK8	-1.72474
CDS1	-1.63947
CEBPB	-1.54435
CFAP61	-3.25223
CFTR	-2.04642
CH25H	-1.76012
CHRFAM7A///CHRNA7///LOC101929970	-1.63564
CHRM3	-1.54906
CHST11	-2.83394
CKMT2	-1.58524
CLN6	-1.63639
CLN8	-1.76832
CNTN3	-2.48627
CNTNAP4	-1.55219
COL4A2	-1.58754
COL8A1	-1.79747
COMTD1	-1.53525
CP	-1.87527
CRYBB2///CRYBB2P1	-1.64146
CSGALNACT1	-1.54462
CTNS	-1.50672
CTSLP8	-2.05281
CYCS	-1.76691
CYP17A1	-2.68542
CYP39A1	-1.89357
CYP4F22	-2.58844
CYSTM1	-1.75634
DDIT3	-1.50326
DEFB1	-2.21189
DENND2D	-1.60885
DGAT1	-1.51993
DHDDS	-1.55852
DISP1///LOC102724017	-1.61723
DKFZP434L187	-1.95098
DKFZP434L187///LOC105370751	-1.57028
DKK1	-1.86453
DNASE1L1	-1.85207
DNASE1L3	-1.97948
DPP6	-1.53917
DSCR3	-1.522
EGLN1	-1.6783
ELOVL7	-1.66184
ENO1	-1.51154
ENO2	-2.12985
EPHA5	-1.59406
EPOR	-1.60048
EPS15L1	-1.66434
EPS15L1///LOC105372294	-1.53816
ESCO1	-2.1614
ESYT2	-1.54343
EVI2B	-1.58634
EXT1	-1.58946
F11R	-1.6627
F2RL1	-1.59426
FAM124A	-2.99554
FAM134B	-1.52
FAM162A	-1.98586
FAM167A	-1.98341
FAM195A///LOC100287175	-1.50608
FBXO32	-1.80154
FGF7	-2.23747
FGF7///KGFLP1///KGFLP2	-2.05759
FIG4	-1.65243
FITM2	-1.55691
FLJ16779	-1.81298
FMOD	-1.50858
FNIP2	-1.62324
FOXF1	-1.5389
FZD8	-1.51784
G0S2	-1.59905
GALNT18	-1.82855
GAPLINC	-1.50086
GCGR	-1.55835
GCNT3	-1.63201
GDPD1	-1.89528
GEMIN4	-1.80416
GK3P	-1.52298
GLA	-1.60917
GLRA3	-1.90804
GM2A	-2.52141
GPAT3	-1.89234
GPD2	-1.69275
GPR157	-1.85164
GPR37	-1.81022
GPRC5A	-2.537
GRAMD1B	-1.53926
GRB14	-2.11236
GREM2	-1.83694
GS1-124K5.4	-1.52752
GUCY2C	-3.85487
HBEGF	-1.81333
HCG4	-1.73855
HGF	-1.69883
HILPDA	-1.57076
HLA-DMB	-1.64566
HS6ST1	-1.54311
HSD11B1	-1.99
HSD3B7	-1.84138
HYAL1	-1.85249
IGF2R	-1.53661
IGFBP3	-3.43302
IGFN1	-2.20776
IL6R	-1.99077
INHBE	-2.60011
INSIG1	-1.5972
INSIG2	-1.91796
ITGBL1	-1.96885
ITLN1	-1.53531
IVNS1ABP	-1.60456
JRK	-1.70487
KAZN	-1.54853
KCNE4	-1.81818
KCNG3	-2.49334
KCNJ4	-1.5605
KCNK1	-1.51109
KIAA1715	-1.52214
KIF26B	-1.59362
KYNU	-1.59072
LAMA4	-1.68542
LAT	-1.5754
LEP	-2.06444
LEPROT	-1.66514
LGALS8	-1.8179
LGALSL	-1.56283
LIMCH1	-1.59219
LINC00520	-1.60516
LINC00588	-1.52682
LINC00969	-1.51095
LINC01315	-2.28667
LINC01588	-1.63704
LINS1	-1.5959
LMAN1	-1.53129
LOC100129518///SOD2	-1.56975
LOC100190986	-1.85464
LOC100505874	-2.00756
LOC100506076///LOC100506123	-2.28596
LOC101060157	-2.00283
LOC101060275///LOC105376851///NPIPA2///NPIPA3///NPIPB11///NPIPB1P///NPIPB3///NPIPB4///NPIPB5	-1.65357
LOC101927057///OMG	-1.89989
LOC101928635	-1.53677
LOC102723847	-2.10339
LOC102724880	-1.70907
LOC105369244///SMG1	-1.88016
LOC643659	-3.46241
LOXL4	-1.85619
LPCAT1	-1.51631
LRRC8C	-2.00894
MAB21L1///MIR548F5	-1.59192
MAFF	-2.01307
MDFIC	-2.14633
MET	-1.54342
METRNL	-1.80984
MFSD1	-1.61059
MFSD5	-1.5297
MGST1	-1.80206
MIR210HG	-2.16309
MIR34AHG	-1.84381
MORF4L2	-1.50142
MREG	-1.85935
MRPS25	-1.56535
MSC	-1.70557
MTMR10	-1.58496
MTTP	-2.57585
MUC13	-3.0132
MYO16	-1.58278
NAMPT	-1.83761
NCEH1	-1.58158
ND6	-1.9748
NDNF	-1.89262
NDRG1	-1.53492
NLRP11	-2.007
NMRK2	-2.42623
NR4A1	-1.95471
NRG2	-2.06492
NTSR2	-1.75972
OLMALINC	-1.55878
OSBPL10	-1.93972
OSMR	-1.79495
PAQR5	-1.72575
PARM1	-1.69214
PCDH20	-1.69832
PCSK1	-1.66874
PCSK6	-2.0341
PDK1	-1.53599
PFKFB2	-1.76222
PGK1	-1.52404
PIM1	-1.51254
PKD1L2	-1.95658
PKP2	-1.64202
PLD6	-2.00169
PLP1	-1.51284
PLPP3	-1.70225
PLPPR4	-1.54956
PLXNA4	-2.22042
PORCN	-1.53786
PPARGC1A	-1.99319
PPP1R3E	-1.69484
PRKAG2	-4.03125
PRKAR2B	-1.50611
PRKXP1	-1.53846
PROK1	-2.37526
PSG2	-1.73182
PSG3	-1.60719
PSG4	-1.55756
PTPRF	-1.50474
PTPRM	-1.71376
RAB20	-1.51321
RAB27A	-1.53715
RAB32	-1.56085
RAET1E	-1.66489
RASGRF1	-1.56543
RDH10	-1.62235
RDH13	-1.7645
RELN	-1.60969
RNF13	-1.58466
RNFT2	-2.15161
RPL10	-1.53663
RPS6KA2	-1.71119
RTN4R	-2.3499
SCD	-1.85048
SDC4	-1.68946
SERPINE1	-1.50234
SFRP1	-1.60092
SFXN4	-1.79113
SLC15A4	-1.82444
SLC16A1	-1.85766
SLC16A7	-1.55136
SLC17A5	-1.68755
SLC19A2	-1.54631
SLC1A1	-1.73467
SLC20A1	-1.84768
SLC22A15	-1.81845
SLC23A2	-1.60584
SLC25A19	-1.50199
SLC26A7	-2.11681
SLC28A3	-1.71232
SLC2A1	-1.51094
SLC2A14///SLC2A3	-1.85432
SLC2A3	-2.18778
SLC33A1	-1.79105
SLC39A14	-1.96881
SLC39A8	-1.57399
SLC41A2	-1.92042
SLC43A3	-1.80946
SLC4A4	-1.67153
SLC51B	-2.28772
SLC6A12	-1.66899
SLC6A15	-1.68216
SLC6A6	-2.01162
SLC6A8	-1.58506
SLC7A11	-1.60709
SLC7A5	-1.51924
SLC7A7	-1.74619
SLIT3	-2.00386
SMYD3	-1.95111
SNCA	-1.52461
SNCB	-1.70959
SNHG12	-1.81514
SOCS3	-1.51511
SPAG4	-1.5225
SPATC1L	-1.51869
SPNS1	-1.58381
SPP1	-2.04206
SPSB1	-2.09829
SPTLC2	-1.63767
ST3GAL5	-1.61766
STAMBPL1	-1.59324
STC1	-2.78261
STEAP3	-1.85003
STX3	-1.81758
SULT1C2	-1.90347
SV2B	-1.92889
SYNGR3	-1.63609
SYT13	-1.74306
SYTL2	-1.77146
TACC2	-1.75429
TBC1D7	-1.51467
TCERG1L	-2.49651
TFE3	-2.45305
TFPI	-1.57538
TFPI2	-1.57341
TFRC	-1.80131
TGFBR3	-1.90059
THEM6	-1.69672
TIMP3	-2.26781
TM6SF1	-1.6507
TMC7	-1.64667
TMEM136	-1.87681
TMEM144	-1.97573
TMEM185B	-1.51136
TMEM231	-1.87924
TMEM251	-1.7548
TMEM33	-1.84323
TMEM41A	-1.52554
TMEM45A	-1.77595
TMEM74B	-1.5839
TNFSF13B	-1.625
TREM1	-1.53013
TRIM63	-1.60759
TRPA1	-1.6245
TSPAN8	-1.53758
TSPEAR-AS2	-1.52915
TUBE1	-1.66029
TULP4	-1.87717
TYR	-1.78686
UBE2QL1	-2.21342
UGT1A1///UGT1A10///UGT1A3///UGT1A4///UGT1A5///UGT1A6///UGT1A7///UGT1A8///UGT1A9	-1.59976
UGT1A1///UGT1A10///UGT1A4///UGT1A6///UGT1A8///UGT1A9	-1.51982
UGT1A6	-1.50982
ULBP2	-1.62323
ULK4	-2.65125
UPP1	-2.16957
VEGFA	-2.81349
VLDLR	-2.06621
VNN1	-1.81299
VPS18	-1.56728
WDR27	-1.93653
WNT9A	-1.52181
ZDHHC23	-1.5911
ZMIZ1-AS1	-3.47402
ZNF330	-1.50995
ZNRD1	-1.54381
